# Supplementary material for: A roadmap of noninstitutional living options for people with dementia: “Don’t fence me in.”
Source: Preprints.org preprint supplement (doi:10.20944/preprints202401.1968.v1), 2024-01-29
Supplement: Supplementary file 1 [file supplementary]

**Supplementary references**

Affleck, A., Parks, P., Drummond, A., Rowe, B. H., & Ovens, H. J. (2013). Emergency department overcrowding and access block. *Canadian Journal of Emergency Medicine*, *15*(6), 359-370.

Alzheimer Europe. (2017). *Dementia as a disability? Implications for ethics, policy and practice: A discussion paper*. Luxembourg: European Union.

Benzie, A., Cacciola, C., Chu, D., Barcellos, N., Grant, R., Niehaus, S., & Nsair, S. (2020). *Alternatives to long-term care & housing: Environmental scan*. Waterloo: City of Waterloo. https://www. waterloo. ca/en/government/resources/Documents/Community-Services/Final-Report_Alternatives-to-LTC-Env-Scan. pdf

Canadian Institute for Health Information (CIHI). (2022). *Dementia in home and community care*. https://www.cihi.ca/en/dementia-in-canada/dementia-care-across-the-healthsystem/dementia-in-home-and-community-care

Carl, C. (2023). Can I get paid to be a family caregiver in Canada? *The Caregiver Space*. Retrieved June 14, 2023 from https://www.thecaregiverspace.org/paid-family-caregiver-canada/

Central East Local Health Integration Network (CELHIN). (2023). *Brock Geriatric Assessment Program*. Retrieved June 13, 2023, from https://www.centraleasthealthline.ca/displayservice.aspx?id=50141

Community Living Toronto (CLT). (2022). *Respite choices*. Retrieved Sept. 22, 2022, from cltoronto.ca/respite

Cohen-Mansfield J, Dakheel-Ali M, Frank JK. (2010).The impact of a Naturally Occurring Retirement Communities service program in Maryland, USA. *Health Promotion International,* 25(2),210-20.

Craddock, T. & Vayid, N. (2004). *Health care co-operatives in Canada.* Ottawa:Co-operatives Secretariat, Government of Canada. https://publications.gc.ca/collections/collection_2012/agr/A80-924-5-2004-eng.pdf

Cranford, C. J. (2020). *Home care fault lines: Understanding tensions and creating alliances*. Ithaca, NY: Cornell University Press.

Crick, Michelle. (2019). *The role of regulation in the care of older people with depression living in long-term care in Ontario.* Unpublished doctoral dissertation, School of Nursing, University of Ottawa.

Curateur public du Québec (2022). *Loi modifiant le code civil, le code de procédure civile, la loi sur le curateur public et diverses dispositions en matière de protection des personnes*. Gouvernement du Québec. Retrieved June 14, 2023, from  https://www.curateur.gouv.qc.ca/cura/pdf/proj_loi/loi_en_un_coup_doeil.pdf

Etters, L., Goodall, D., & Harrison, B. E. (2008). Caregiver burden among dementia patient caregivers: A review of the literature. *Journal of the American Academy of Nurse Practitioners*, *20*(8), 423-428.

Flood, C. M., Thomas, B., & White, K. (2021). Excellent long-term care for Canadians and federal legislation. *HealthcarePapers*, *20*(1), 27-33. DOI:10.12927/hcpap.2021.26643

Freedman, A., & Nicolle, J. (2020). Social isolation and loneliness: The new geriatric giants: Approach for primary care. *Canadian Family Physician*, *66*(3), 176-182.

Gleeson, H., Hafford-Letchfield, T., Quaife, M., Collins, D. A., & Flynn, A. (2019). Preventing and responding to depression, self-harm, and suicide in older people living in long term care settings: A systematic review. *Aging & Mental Health*, *23*(11), 1467-1477.

Government of Canada (2023a). *EI caregiving benefits: What these benefits offer*. Retrieved June 14, 2023, from https://www.canada.ca/en/services/benefits/ei/caregiving.html

Government of Canada (2023b). *Canada caregiver credit*. Retrieved June 14, 2023, from https://www.canada.ca/en/revenue-agency/services/tax/individuals/topics/about-your-tax-return/tax-return/completing-a-tax-return/deductions-credits-expenses/canada-caregiver-amount.html

Government of Saskatchewan. (2023). *Individualized funding for home care*. Retrieved October 19, 2023, from <https://www.saskatchewan.ca/residents/health/accessing-health-care-services/care-at-home-and-outside-the-hospital/individualized-funding-for-home-care#step-2>

Hébert, R. (2016). Still-born autonomy insurance plan in Quebec: An example of a public long-term care insurance system in Canada. *HealthcarePapers*, *15*(4), 45-50.

Herron, R., Kelly, C., & Aubrecht, K. (2021). A Conversation about ageism: Time to deinstitutionalize long-term care? *University of Toronto Quarterly*, *90*(2), 183-206.

Kelly, C. (2016). *Disability politics and care.* Vancouver: UBC Press.

Kristof, L., Fortinsky, R. H., Kellett, K., Porter, M., & Robison, J. (2017). Experiences of informal caregivers of older adults transitioned from nursing homes to the community through the Money Follows the Person demonstration. *Journal of Aging & Social Policy*, *29*(1), 20-34.

Law Commission of Ontario (LCO). (2023). *Glossary of terms*. <https://www.lco-cdo.org/en/our-current-projects/legal-capacity-decision-making-and-guardianship/final-report/xiii-glossary-of-terms/>

Lord, J. (2022, March 8). *Aging well with ‘natural supports*.’ https://www.seniorsactionontario.com/policyandresearch

MacAdam, M. (2011). Progress toward integrating care for seniors in Canada: “We have to skate toward where the puck is going to be, not to where it has been.” *International Journal of Integrated Care*, *11*(10th Anniversary Edition).

Mar, L. (2020). Population aging in Canada: Examining the caregiving needs of the elderly. *The Sociological Imagination: Undergraduate Journal*, *6*(1).

Melis, R. J., Haaksma, M. L., & Muniz-Terrera, G. (2019). Understanding and predicting the longitudinal course of dementia. *Current Opinion in Psychiatry*, *32*(2), 123.

Microboards Ontario (2022). *About microboards*. Retrieved November 2, 2023, from https://www.microboardsontario.com/microboards-values-benefits-principles-functions-roles.html

Milne, A. (2010). The ‘D’ word: Reflections on the relationship between stigma, discrimination and dementia. *Journal of Mental Health*, *19*(3), 227-233.

Minkowitz, T. (2006). The United Nations Convention on the Rights of Persons with Disabilities and the right to be free from nonconsensual psychiatric interventions. *Syracuse Journal of International Law & Commerce*, *34*, 405.

Mistry, N. (2021). Ageism in the context of healthcare in Canada. *University of Ottawa Journal of Medicine*, *10*(2).

National Institute on Ageing (NIA). (2021, March). *Pandemic perspectives on long-term care: Insights from Canadians in light of COVID-19.* Toronto: Toronto Metropolitan University.

Nemiroff, L. (2022, March). We can do better: Addressing ageism against older adults in healthcare. *Healthcare Management Forum, 35*(2), 118-122..

Parry, M., Beleno, R., Nissim, R., Baiden, D., Baxter, P., Betini, R., ... & Peter, E. (2023). Mental health and well-being of unpaid caregivers: A cross-sectional survey protocol. *BMJ Open*, *13*(1), e070374.

Pywell, E., Ottley, K. M., Dolatabadi, A., Maza, J., Lawrenz, K., Hutchinson, J., Heather, H., Wickson-Griffiths, A., & Paulette V. Hunter. (2023, March 20). A mixed-methods scoping review of long-term care facility design and associated outcomes [preprint]. Retrieved December 9, 2023, from https://stmcollege.ca/documents/academic-initiatives/faculty-research/getting-results-for-ltc-2023-04-17.pdf

Quinn, C., & Toms, G. (2019). Influence of positive aspects of dementia caregiving on caregivers’ well-being: A systematic review. *The Gerontologist*, *59*(5), e584-e596.

Salsbury Lyons, S. (2010). How do people make continence care happen? An analysis of organizational culture in two nursing homes. *The Gerontologist, 50*(3), 327-339. DOI: 10.1093/geront/gnp157

Seniors for Social Action Ontario (SSAO). (2022, December 5). *Taking matters into our own hands: Health care co-ops – Is it time?* <https://www.seniorsactionontario.com/policyandresearch>

Seniors for Social Action Ontario (SSAO). (2022, November 28). *A nice bucket of suds: How could the Ford government get out of the mess it has made in long-term care?* www.seniorsactionontario.com

Seniors for Social Action Ontario (SSAO). (2022, November 21). *Doing with or doing for? Reablement as an older adults’ empowerment strategy: A research and policy paper*. <https://www.seniorsactionontario.com/policyandresearch>

Seniors for Social Action Ontario (SSAO). (2021, June 8). *Hub and spoke model of caring for older adults in the community*. https://www.seniorsactionontario.com/_files/ugd/50033d_b5214dc0d4d24a83a7fd22a12e74f742.pdf

Seniors for Social Action Ontario (SSAO). (2021, April 21). *Denmark – The gold standard in long term care: How Denmark’s approach is different from Ontario’s.* www.seniorsactionontario.com

Seniors for Social Action Ontario (SSAO). (2021, February 25). *A paid family caregiver program for Ontario.* seniorsactionontario.com/policyandresearch

Seniors for Social Action Ontario (SSAO). (2021, February 23). *A program in which money follows the person.* seniorsactionontario.com/policyandresearch

Seniors for Social Action Ontario (SSAO). (2021, March 31). *No place like home: Small community residences for people with dementia.* seniorsactionontario.com/policyandresearch

Steele, L. & Swaffer, K. (2022). Reparations for harms experienced in residential aged care. *Health and Human Rights Journal*, 24(2), 71-83.

Strang, V. R., & Haughey, M. (1998). Factors influencing the caregiver's ability to experience respite. *Journal of Family Nursing*, *4*(3), 231-254.

Thériault, D., & Dupuis-Blanchard, S. (2017). Maintien à domicile : capacité d’offre de services communautaires actuels et futurs au Nouveau-Brunswick. *Service social*, *63*(2), 143-159.

United Nations (UN), Department of Economic and Social Affairs, Social Inclusion. (2006). Article 12 - Equal recognition before the law*. Convention on the rights of persons with disabilities* (CRPD) [treaty]. <https://social.desa.un.org/issues/disability/crpd/article-12-equal-recognition-before-the-law>

Women’s College Hospital. (2023). *Naturally occurring retirement communities: What works best to support older adults to age in place?* Retrieved June 5, 2023, from https://www.womenscollegehospital.ca/naturally-occurring-retirement-communities-what-works-best-to-support-older-adults-to-age-in-place/
